# Supplementary material
Source: publisher figshare collection journal article supplement (https://springernature.figshare.com/ndownloader/files/12294470)

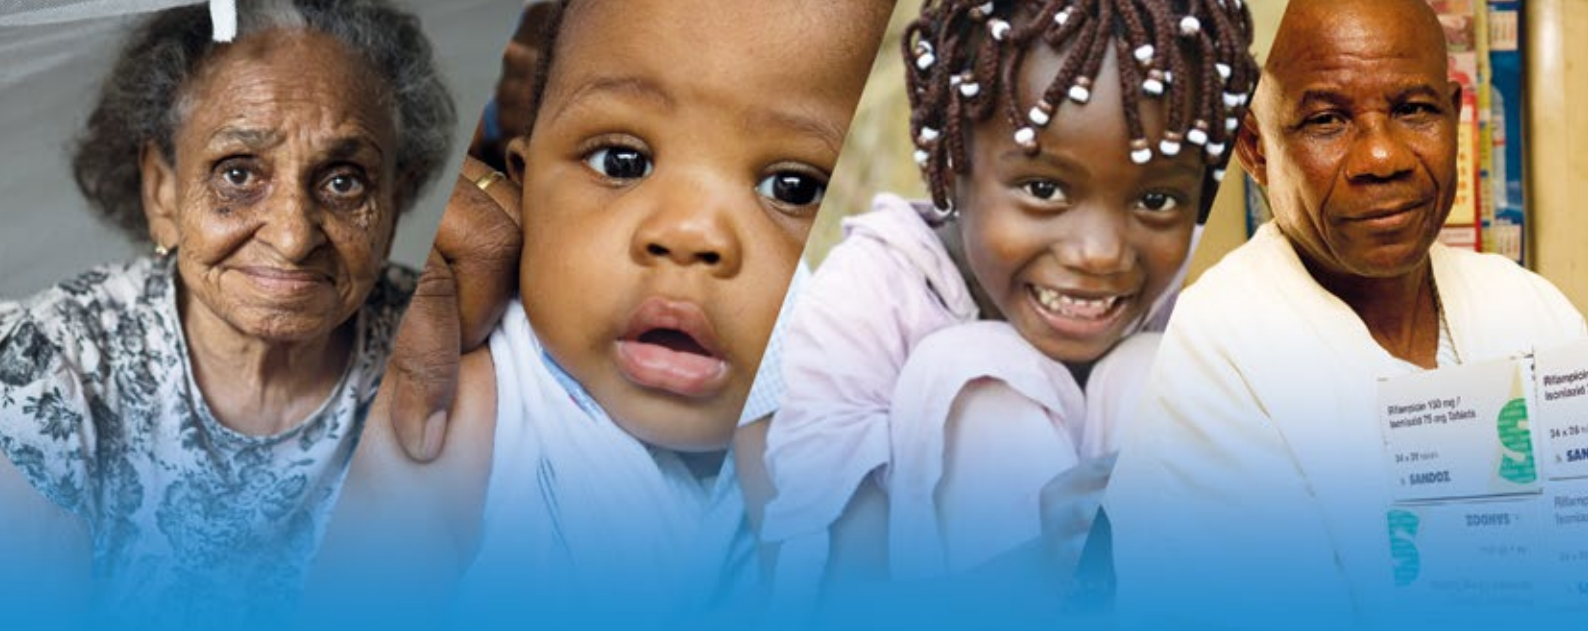

The First WHO  
Africa Health Forum

# PUTTING PEOPLE FIRST

## The Road to Universal Health Coverage in Africa

Kigali, Rwanda, 27 – 28 June 2017

Republic of Rwanda

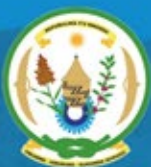

Ministry of Health

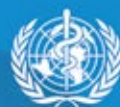

World Health  
Organization  
REGIONAL OFFICE FOR  
Africa

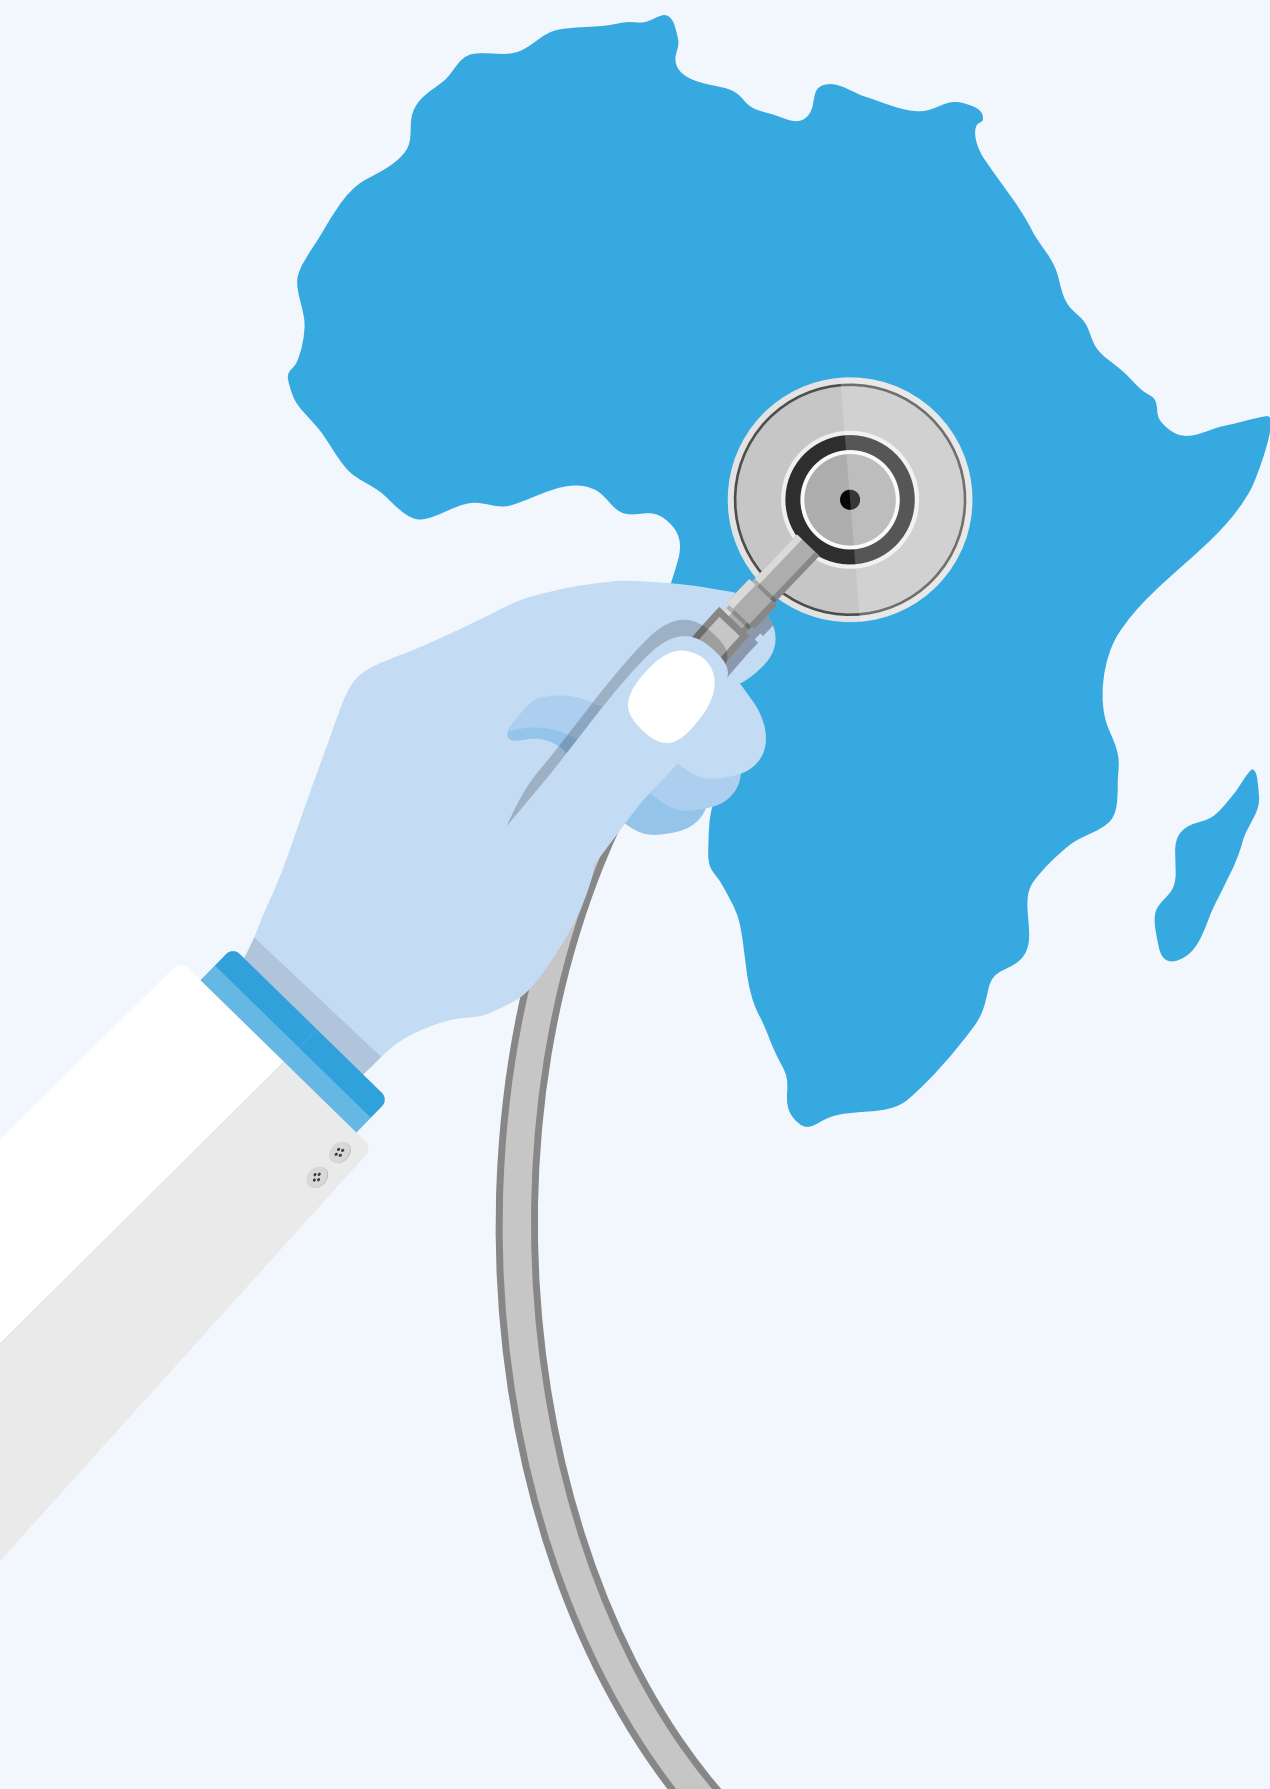

## **WELCOME**

Welcome to the inaugural Africa Health Forum of WHO in the African Region. “Putting People First: The Road to Universal Health Coverage” is the Forum to discuss the future of healthcare across the continent, and subsequently the prosperity and economic welfare of our future.

I thank the Government of Rwanda for the kind hospitality and excellent arrangements made for this landmark event.

I am delighted you have joined us as strategic partners at this Forum. We all know that health is central to development and that partnerships are key to improving access to health and wellbeing. The Sustainable Development Goals reinforce the fact that a multisectoral approach is the foundation to Universal Health Coverage.

The Africa Health Forum brings together people from a wide spectrum of sectors to discuss challenges and opportunities for effective health service delivery and policy priorities in the Region. Furthermore, in line with our reform agenda, we are engaging in strategic partnerships with stakeholders particularly the youth, to strengthen their role in the future of health service delivery in Africa. We are putting people first to ensure that no one is left behind.

WHO in the African Region is committed to working with its Member States and partners to attain the highest possible level of health for Africa’s people by achieving the Sustainable Development Goals and in particular Universal Health Coverage for all.

I trust that you will find this Forum engaging, and that it will be the beginning of a fruitful partnership. Enjoy your stay in Kigali and we look forward to your continuous engagement and collaboration.

Yours sincerely

**Dr Matshidiso Moeti**

WHO Regional Director for Africa

## ABOUT WHO AFRO

The goal of the WHO is to build a better, healthier future for people all over the world. WHO AFRO is one of the six regional offices of the organisation. As the technical agency and custodian of public health in Africa, the regional office seeks to galvanise political commitment, foster collaboration and align strategic priorities in advancing the health agenda in the region, especially around the Sustainable Development Goals. Strategic partnerships, effective engagement and coordinated action are critical for addressing the urgent and ever changing health needs of people living in Africa.

## WHO AFRO SENIOR MANAGEMENT

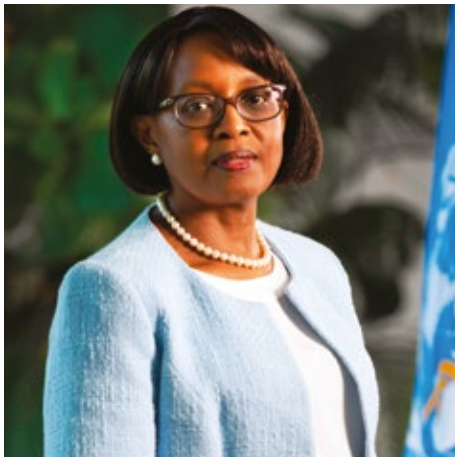

**Dr Matshidiso Moeti**

Regional Director for Africa

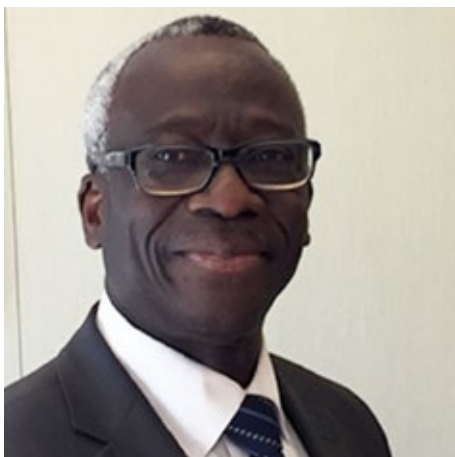

**Dr Joseph Caboré**

Director for Programme  
Management

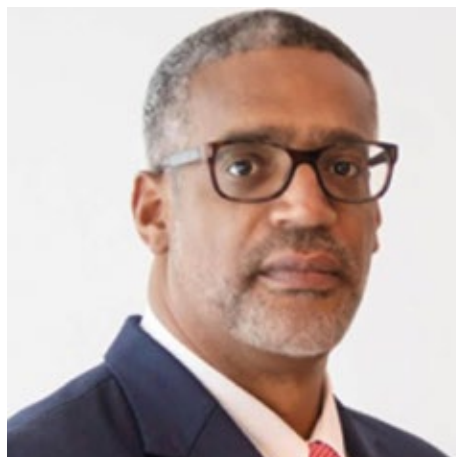

**Mr Raul Thomas**

Director, General Management



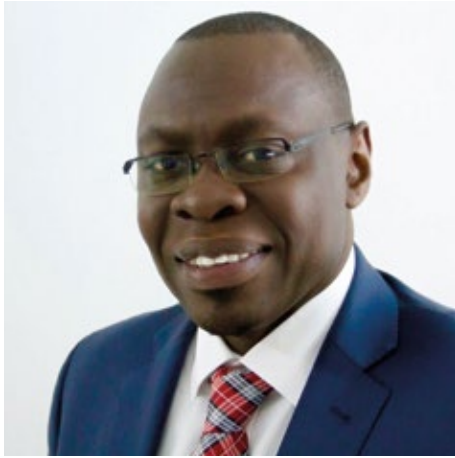

**Dr Ibrahim Socé Fall**

Director, Regional Emergencies

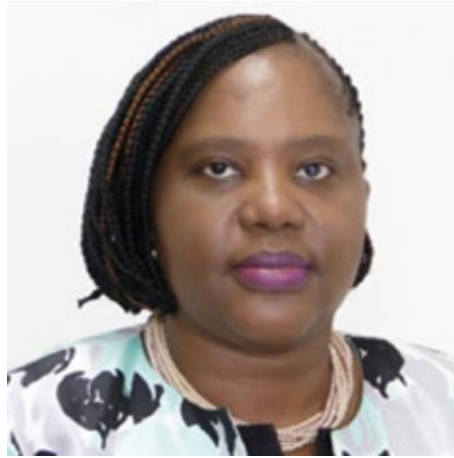

**Dr Mwelecele Ntuli Malecela**

Director, Office of Regional Director

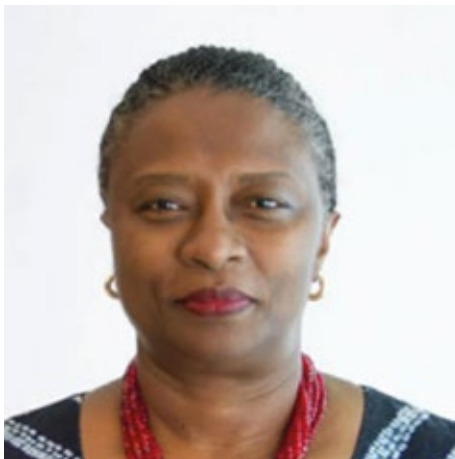

**Dr Magda Robalo**

Director, Communicable Diseases

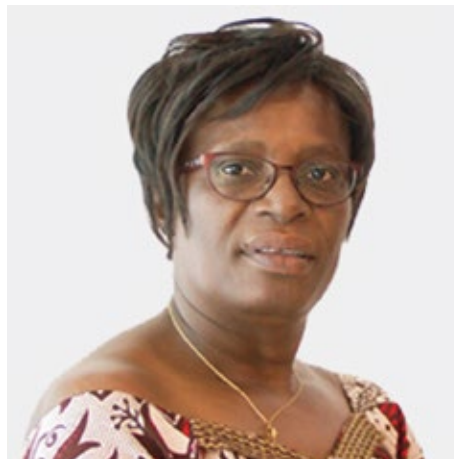

**Dr Felicitas Zawaira**

Director, Family and Reproduction Health

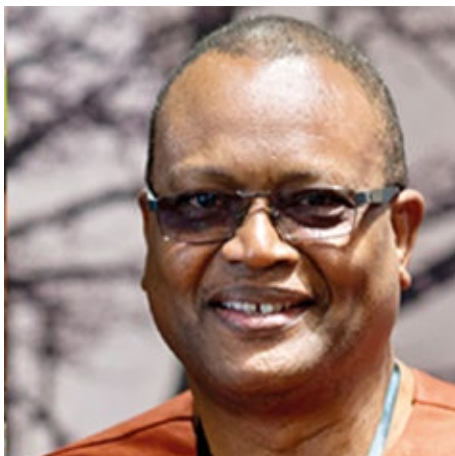

**Dr Delanyo Dovlo**

Director, Health Systems and Services

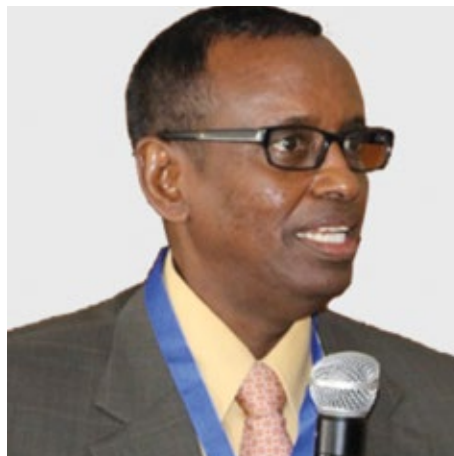

**Dr Abdikamal Alisalad**

Director, Non-communicable Diseases

## FORUM PROGRAMME

### DAY 1

**27 JUNE 2017**

09:00 am – 10:00 am

Registration – Kigali Heights: 2nd floor Eastern Wing  
opposite the Kigali Convention Centre

Networking – Foyer 1A at the Kigali Convention Centre

**10:00 AM – 11:00 PM | Auditorium**

### Opening Ceremony

#### *Master of Ceremony*

*Dr Jean Pierre NYEMAZI, Permanent secretary, Ministry of Health*

#### *Welcome remarks*

*Dr Matshidiso Moeti, WHO Regional Director for Africa*

#### *Keynote address*

*Guest of Honor*

11:00 am – 11:30 am

Health break & networking – Foyer 1A

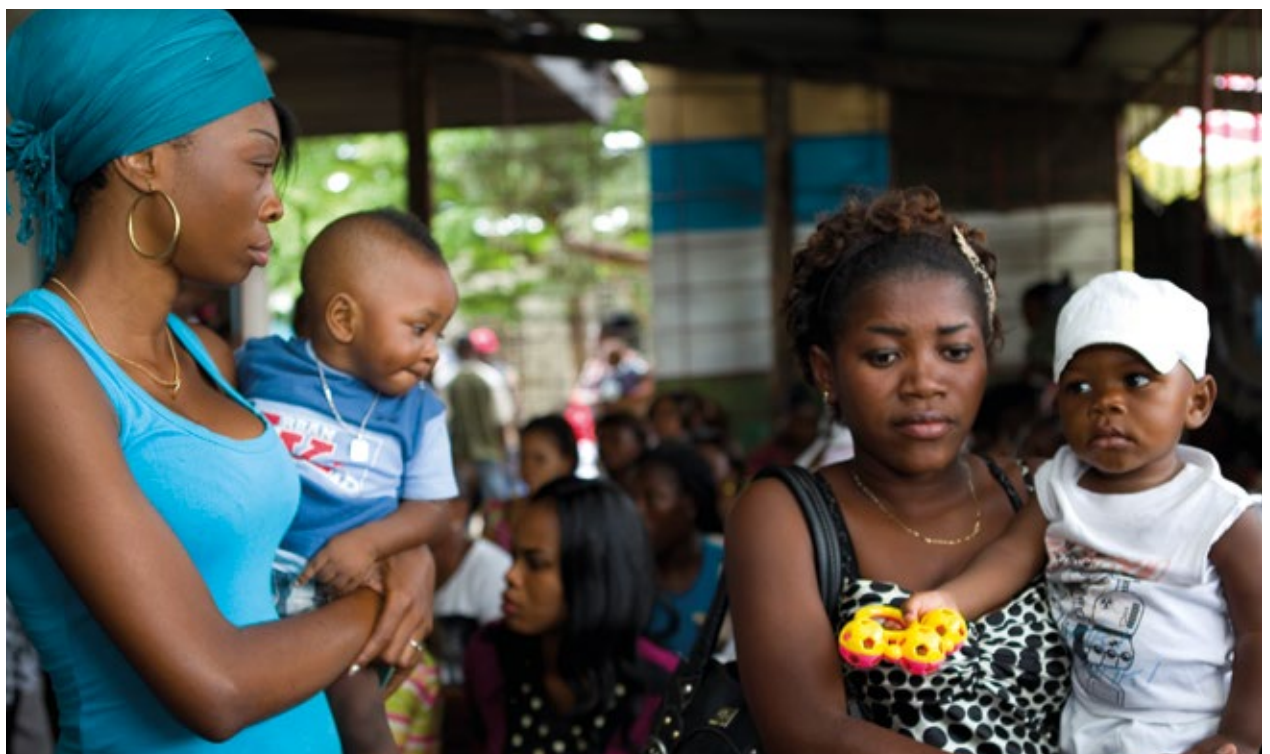

## Session 1 : Health financing: Getting value for money – Taking financial responsibility for our own health

Sustainable health financing has long been recognised as an essential part of Universal Health Coverage and an important plank in achieving the aims of the Sustainable Development Goals. In recent years the concept has led to numerous health reforms including health financing, health insurance and results-based financing reforms. These have been influential in redefining how finances for health are mobilised, managed and used to purchase essential health services across Africa.

### *Moderator*

*Mr Andrew Mwenda, Journalist & Founder, the Independent, Uganda*

### *Keynote speaker*

*Dr Timothy G. Evans, Senior Director, The World Bank Group, USA*

### *Panelists*

*Dr Uzziel Ndagijimana, Minister of State in Rwanda's Ministry of Finance*

*Mr Carl Manlan, COO, Ecobank Foundation, Ghana*

*Hon. Sarah Opendi, Minister of State for Health (General Duties) Uganda*

*Dr Githinji Gitahi, Group CEO, Amref Health Africa Headquarters, Kenya*

*Mr Fletcher Tembo, Director for the Making All Voices Count Programme, Kenya*

1.00 PM – 2.00 PM

Lunch & networking – Foyer 1A

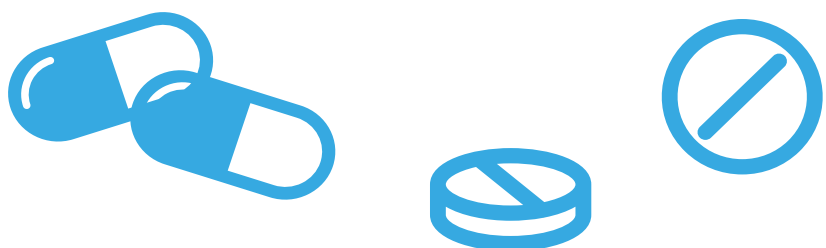

## Side event – E-Health

The session will witness the launch of a joint effort between WHO and the International Telecommunication Union (ITU) and the signing of a “Letter of Intent”. ICT is already transforming how health care is delivered and how health systems are run. For ICT to achieve the health goals such as SDGs, and to ensure healthy lives and promote well-being for all for the African region, the proposed partnership will consolidate existing efforts and resources towards making available ICT foundations and platforms that are a requirement for providing and scaling up eHealth services. It will also focus on building a capable workforce to effectively use ICT. The partnership will address also the need of multi-stakeholders partnership models that can bring about sustainable adoption of Digital Health.

### Moderator

*Dr Delanyo Dovlo, Director, Health Systems and Services, WHO AFRO*

### Co – Chairs

*Mr Andrew Rugege, ITU Regional Director for Africa*

*Dr Matshidiso Moeti, WHO Regional Director for Africa*

### Panelists

*Hon. Prof. Léon Nzouba, Minister of Public Health and Population, Gabon*

*Hon. Prof. Isaac Folorunsho, Minister of Health, Nigeria*

*Hon. Dra. Nazira Karimo Vali Abdula, Minister of Health, Mozambique*

*Hon. Jean Philbert Nsengimana, Minister of Information Communication Technology, Rwanda*

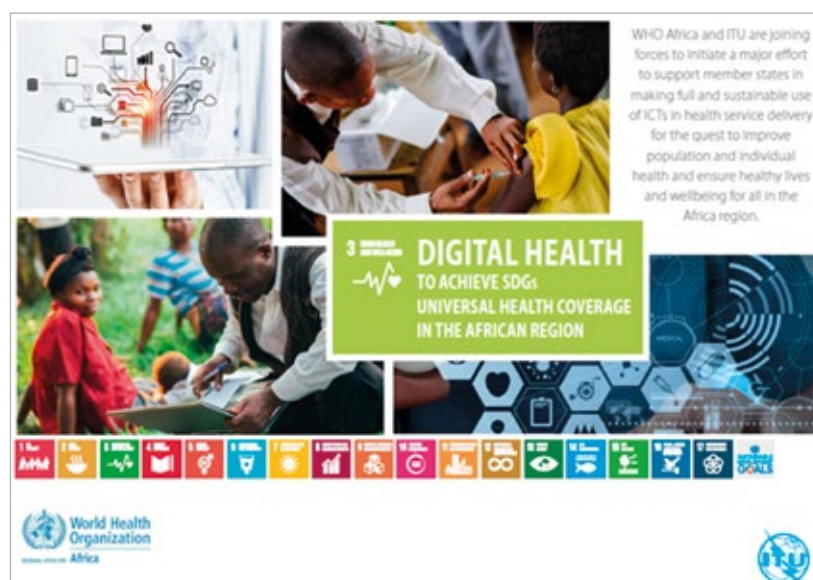



## Session 2: Global health security: Protecting the people of Africa

This panel will discuss lessons learned in managing various recent public health emergencies. It underscores the fact that public health emergencies have the potential to threaten African (indeed global) peace and security, disrupt national economic activities, and destroy health systems and communities.

### *Moderator*

*Ms Julie Gichuru, Founder & CEO, Arimus Media, Kenya*

### *Keynote speaker*

*Dr Bernice Dahn, Minister of Health, Liberia*

### *Panelists*

*Dr Donal Brown, Director East and Central Africa, Department for International Development, UK*

*Dr Adeiza Ben Adinoyi, Head of Africa Health and Care Unit, International Federation Red Cross, Kenya*

*Dr John Nkengasong, Director, Africa Centres for Disease Control and Prevention, Ethiopia*

*Dr Rebecca Martins, Director of the Centre of Global Health, US Centers for Disease Control and Prevention, USA*

*Mr Tewolde GebreMariam, CEO, Ethiopian Airlines, Ethiopia*

*Dr Emmanuel Ndahiro, Director, Rwanda Military Hospital, Rwanda*

3:30 pm – 4:00 pm

Health break & networking – Foyer 1A

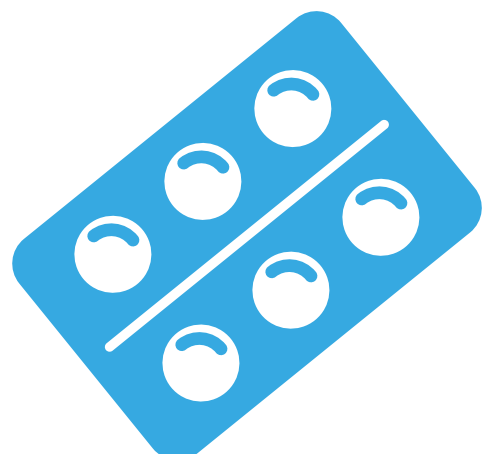

### Session 3: Health research, innovation and data for sustainable development

The African region has a high burden of diseases, with no interventions for many that disproportionately affect its population. This challenge will hinder achievement of the Sustainable Development Goals (SDGs) and Universal Health Care (UHC) if left unmitigated. The health research systems in the region could address this challenge if given the needed prominence. This session is aimed at advocating for a new era of health research and innovation to develop diagnostic, preventive and therapeutic interventions that will contribute to progress towards the SDGs and UHC.

#### *Moderator*

*Mr Henry Bonsu, Journalist and Broadcaster, London, UK*

#### *Keynote speaker*

*Dr Michael Makanga, Executive Director, European & Developing Countries Clinical Trials Partnership (EDCTP), the Netherlands*

#### *Panelists*

*Dr Mary Amuyunzu-Nyamongo, Director and Technical Adviser, African Institute for Health and Development (AIHD), Kenya*

*Mr Joseph B. Babigumira, Assistant Professor, Global Health and Pharmacy, University of Washington, USA*

*Professor Pontiano Kaleebu, Director, Uganda Virus Research Institute (UVRI), Uganda*

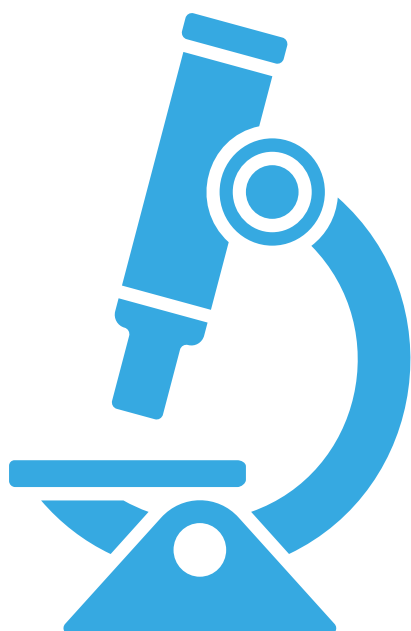

5:30 pm – 7:00 PM | AD10

## Side event: Engaging Africa's Youth to achieve UHC

### *Moderator*

*Dr Waruguru Wanjau, Medical Doctor, Kenya*

### *Opening remarks*

*Dr Matshidiso Moeti, Regional Director, WHO Regional Office for Africa, Congo*

### *Panelists*

*Dr Githinji Gitahi, Group CEO, Amref Health Africa, Kenya*

*Dr Peter Okebukola, Associate Partner at McKinsey & Company, Nigeria*

*Mrs Abam Gladys Mambo-Doh, Director, Africa Ethics & Compliance Africa, GlaxoSmithKline, South Africa*

*Mr Magnifique Irakoze, Regional Coordinator for Africa, International Federation of Medical Students Associations, Rwanda*

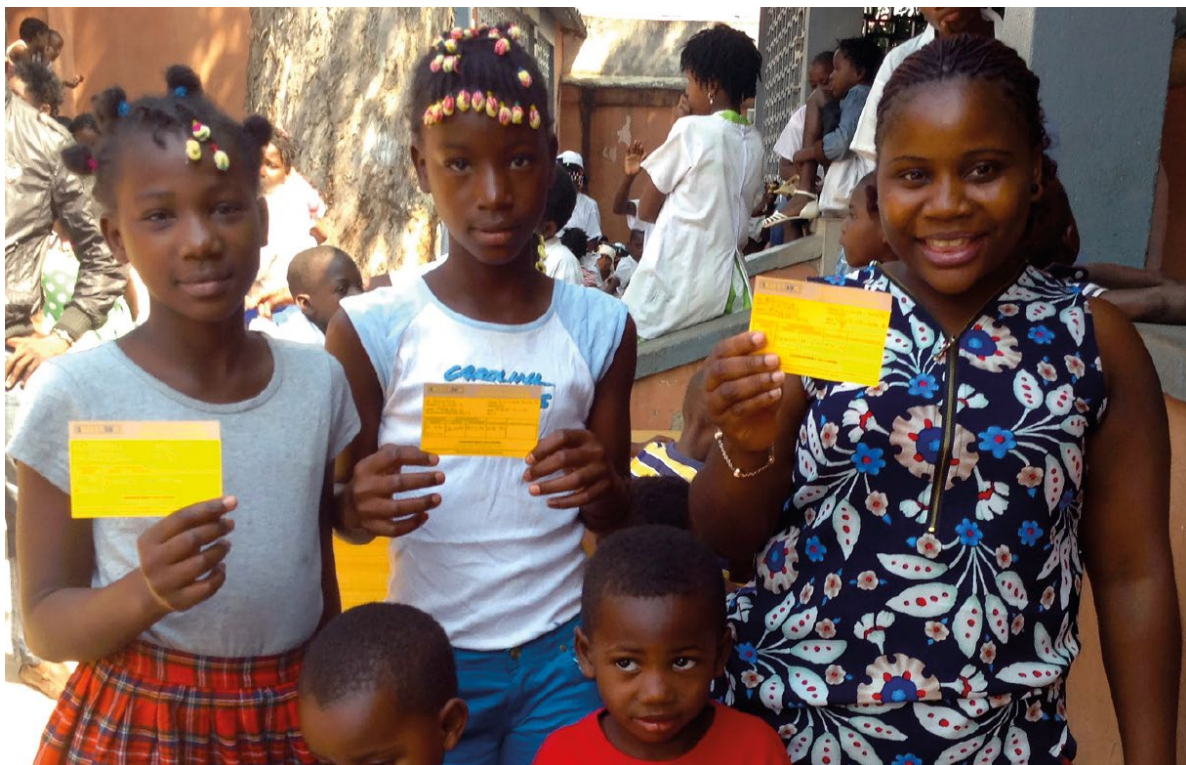

7:00 PM

**Cocktail offered by the Government of Rwanda:  
Terrace Kigali Convention Centre**

## FORUM PROGRAMME

### DAY 2

28 JUNE 2017

08:00 am – 09:00 am

Registration – Kigali Heights: 2nd floor Eastern Wing  
opposite the Kigali Convention Centre

Networking – Foyer 1A at the Kigali Convention Center

09:00 AM – 10:30 AM | Auditorium

#### **Session 4: Making UHC work in Africa – How can the private sector contribute?**

Strengthening existing partnerships and creating new connections will be key to attaining the goal of Universal Health Coverage – i.e. that all people obtain the health services they need without suffering financial hardship when paying for them. To achieve this goal, partnering with the private sector is fundamental. Finding new approaches to utilising partnerships has to come from all levels of government and beyond. Policymakers have to open the door for collaboration with the private sector, and partners have to create innovative solutions that can expand access to health services in new ways. The panel will discuss the role, importance and added value of private sector engagement in the context of Africa's efforts to achieve Universal Health Coverage.

#### *Moderator*

*Ms Julie Gichuru, Founder and Chief Executive Officer at Arimus Media, Kenya*

#### *Panelists*

*Dr Solange Hakiba, Deputy Director General Benefits, Rwanda Social Security Board, Rwanda*

*Mr Jithu Jose, General Manager, Apollo Hospitals, India*

*Dr Belay Begashaw, Director General, Sustainable Development Goals Centre for Africa, Rwanda*

*Ms Adesimbo Ukiri MD/CEO, Avon Healthcare Limited, Nigeria*

*Dr Peter Okebukola, Associate Partner, McKinsey & Company, Nigeria*

10:30 pm – 11:00 pm

Health break & networking – Foyer 1A



**Session 5: Old enemies (HIV, TB, Malaria), new threats (NCDs Urbanization, Climate change)**

While facing a huge burden of communicable diseases, new threats such as non-communicable diseases and the impact of climate change are jeopardising the human, social and economic development of African populations. Equitable access to health care and prevention remains a distant goal in most countries. The demographic transition in the continent represents both an opportunity as well as a threat especially if suitable development options for healthcare and prevention are not adopted and implemented. The panel discussion will aim to inspire Africa led action to address challenges related to communicable, non-communicable diseases and environmental determinants of health.

*Moderator*

*Mr Henry Bonsu, Journalist and Broadcaster, London, UK*

*Keynote speaker*

*Ambassador Macharia KAMAU, Kenya's Ambassador and Permanent Representative to the UN, USA*

*Panelists*

*Professor Jean-Claude Mbanya, Professor of Medicine and Endocrinology, University of Yaounde, Cameroon*

*Mr Pascal Nyamurinda, Mayor of Kigali, Rwanda*

*Hon. Dr Mohammad Anwar Husnood, Minister of Health and Quality of Life, Mauritius*

*Professor Michael Marmot, Director Institute of Health, Equity, UK*

12:30 pm – 2:00 pm  
Lunch & networking –  
Foyer 1A

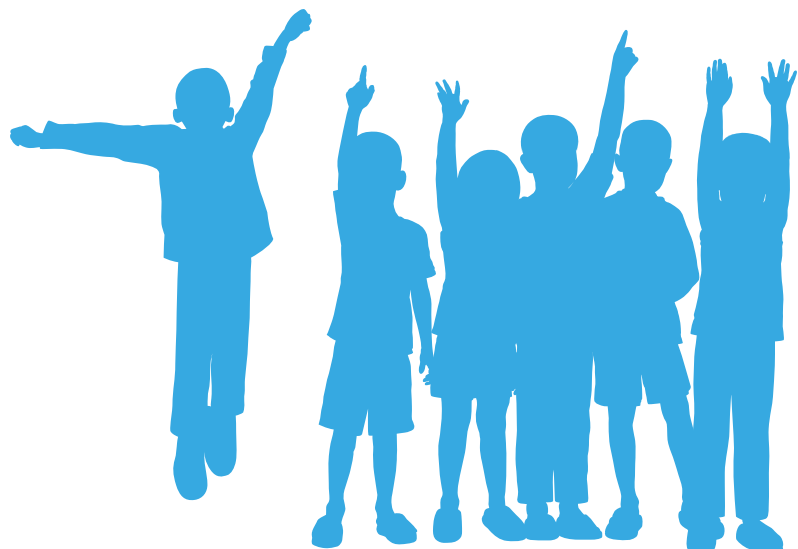

### Special event on Adolescent Health

The African continent is the only region in the world where the number of adolescents is predicted to increase over the next 50 years. The proportion of the world's adolescent and youth living in Africa is expected to rise from 18 % in 2012 to 28 % by 2040, while the shares for all other region will decline. Within this context, the health and development of Africa's adolescents will be key to achieving the Sustainable Development Goals.

#### *Master of Ceremony*

*Dr Jeanine Condo, General Director , Rwanda Biomedical Center*

#### *Moderators*

*Ms Gogontlejang Phaladi, Devolpment Practitioner, AfriYAN*

*Mr Patrick Sewa Mwesigye, Country Director of AfriYAN, Executive Director of Uganda Youth and Adolescent Health Forum*

#### *Keynote speaker*

*Guest of Honor*

#### *Panelists*

*Ms Nadege Munyaburanga Uwase, Young girls, activist for adolescent health*

*Ms Francine Muyumba, President of the African Youth Union*

*Dr Felicitas Zawaira, Director Family and Reproductive Health, WHO*

*Mrs Julitta Onabanjo, UNFPA Regional Director*

*Dr. Valentina Baltag, Scientist,  
WHO, Switzerland*

#### *Concluding remarks*

*Dr Matshidiso Moeti, WHO Regional Director for Africa*

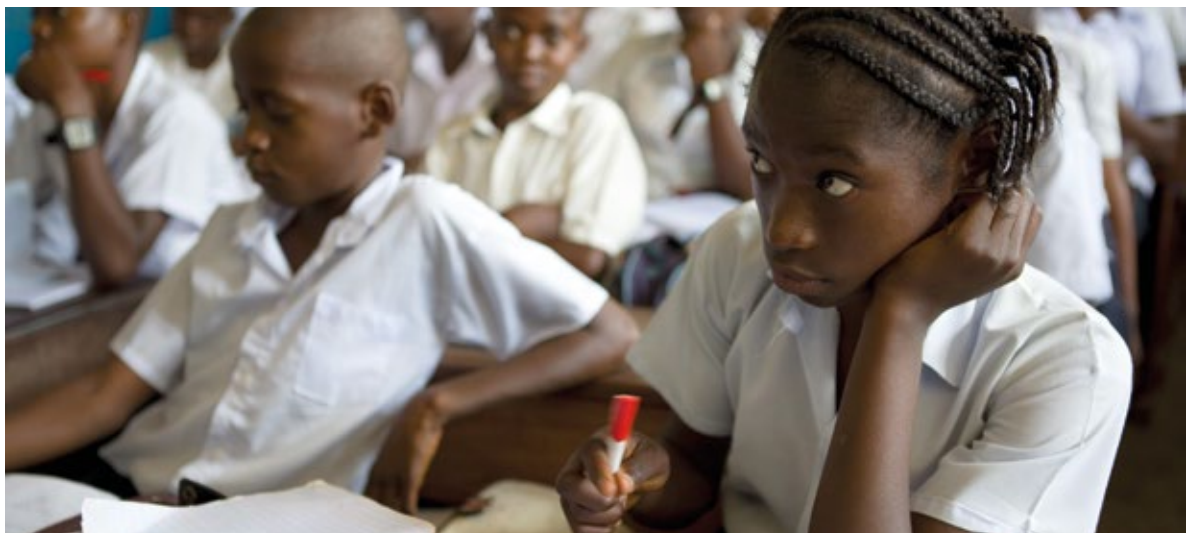

## Session 6: Putting people first – bringing better health to Africa's people

Countries in the African region have made commendable strides in health, however the newly adopted Sustainable Development Goals require greater efforts to ensure healthy lives and wellbeing for all. It is critical to improve the scope and mode of delivery of health services and also to address the existing inequities in order to have a meaningful impact on people's lives. The health sector interventions will need to be complemented by inter-sectorial action to effectively address the social, economic and environmental determinants of health. At the end it is important to identify ways countries can optimise the multiplicity of stakeholders and the different resources to build a resilient health system that will sustainably address the health and wellbeing of the people without leaving anyone behind.

### *Moderator*

*Ms Gogontlejang Phaladi, Founder and Executive Director, Gogontlejang Phaladi Pillar of Hope Organization, Botswana*

### *Panelists*

*Professor Jean Claude Mbanya, Professor of Medicine and Endocrinology, Yaounde, Cameroon*

*Dr Timothy G. Evans, Senior Director, World Bank Group, USA*

*Dr Mary Amuyunzu Nyamongo, Founder Director and Technical Adviser, African Institute for Health and Development (AIHD), Kenya*

*Dr Solange Hakiba, Deputy Director General, Rwanda Social Security Board, Rwanda*

*Dr Bernice Dahn, Minister of Health, Liberia*

4:30 pm – 5:00 pm

Health break & networking – Foyer 1A

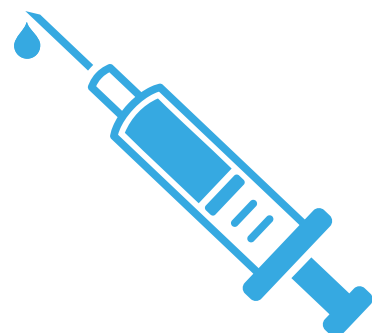

## Closing Ceremony

### *Master of Ceremony*

*Dr Jean Baptiste MAZARATI, Director, Bio-Medical Services, RBC*

### *Presentation of the Call to Action*

*Dr Diane Gashumba, Minister of Health, Rwanda*

### *Closing Remarks*

*Dr Matshidiso MOETI, WHO Regional Director for Africa*

*6.30 pm: End of the First WHO Africa Health Forum*

*Please note this is a preliminary programme and changes may occur.*

#### **World Health Organization – Regional Office for Africa**

Cité du Djoué  
P.O. Box 06 Brazzaville  
Republic of Congo  
0047 241 39100

Tel: + (242) 06 508 11 14

Fax: + (47 241) 39503

Email: [AfricaHealthForum@WHO.int](mailto:AfricaHealthForum@WHO.int)

[www.afro.who.int](http://www.afro.who.int)

#### **Download the Forum App on:**

Apple Store

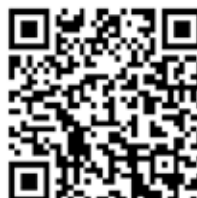

Google Store

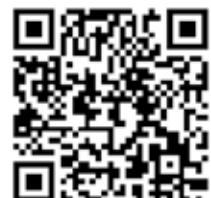

Supplement: Supplementary file [file 12294470]
